# Supplementary material for: Influence of the Substituents on the Opening of Silylepoxy Alcohols: 5-exo-Cyclization towards Tetrahydrofurans vs. Unexpected Side Reaction Leading to Tetrahydropyrans
Source: MDPI journal article supplement (doi:10.3390/molecules26237386), 2021-12-06
Supplement: s1 [file s1]

# SUPPORTING INFORMATION

---

## **Influence of the substituents on the opening of silylepoxy alcohols: 5-*exo* cyclization towards tetrahydrofurans *vs* unexpected side reaction leading to tetrahydropyrans**

**Carlos Díez-Poza and Asunción Barbero\***

Department of Organic Chemistry, Faculty of Science, University of Valladolid, Campus Miguel Delibes, 47011, Valladolid, SPAIN.

E-mail: [asuncion.barbero@uva.es](mailto:asuncion.barbero@uva.es)

Web: <http://organosilanesorganicsynthesis.blogs.uva.es/>

---

### **Table of Contents**

|                                                                   |     |
|-------------------------------------------------------------------|-----|
| 1. X-Ray Crystallographic Data of compound <b>4e</b> and <b>8</b> | S-2 |
| 2. Copies of NMR Spectra                                          | S-6 |

### 3.1 X-Ray Crystallographic Data of compound **4e**

The crystal structure has been deposited at the Cambridge Crystallographic Date Center and allocated the deposition number CCDC: 2118173. This data can be obtained free of charge from the Cambridge Crystallographic Date Center via [www.ccdc.cam.ac.uk/data\\_request/ci](http://www.ccdc.cam.ac.uk/data_request/ci)

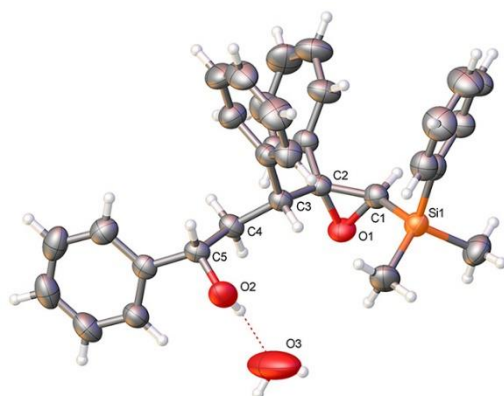

**Figure 2.** X-ray crystal structure of (1R\*, 3S\*, 4S\*, 5S\*)-4,5-epoxy-5-dimethyl(phenyl)silyl-1,3,4-triphenyl-pentan-1-ol **4e**

### Experimental

Single crystals of  $C_{31}H_{34}O_3Si$  (**4e**) were plates. A suitable crystal was selected and kept at 296.15 K during data collection. Using Olex2, the structure was solved with the ShelXT structure solution program using Direct Methods and refined with the ShelXL refinement package using Least Squares minimization.

X-Ray crystallographic data of **4e** (Figure 2). Crystal data and structure refinement for **4e**

---

Bond precision: C-C = 0.0029 Å                      Wavelength=1.54184

Cell:                      a=9.31052(11)              b=18.41150(17)              c=16.27509(14)  
                            alpha=90                      beta=97.2884(9)              gamma=90

Temperature:              296 K

|                        | Calculated          | Reported Volume         |
|------------------------|---------------------|-------------------------|
|                        | 2767.35(5)          | 2767.35(5)              |
| Space group            | P 21/n              | P 1 21/n 1              |
| Hall group             | -P 2yn              | -P 2yn                  |
| Moiety formula         | C31 H32 O2 Si, H2 O | C31 H32 O2 Si, H2 O Sum |
| formula                | C31 H34 O3 Si       | C31 H34 O3 Si           |
| Mr                     | 482.67              | 482.67                  |
| Dx, g cm <sup>-3</sup> | 1.158               | 1.159                   |
| Z                      | 4                   | 4                       |
| Mu (mm <sup>-1</sup> ) | 0.967               | 0.967                   |
| F000                   | 1032.0              | 1032.0                  |
| F000'                  | 1035.73             |                         |
| h, k, lmax             | 11, 23, 20          | 11, 23, 20              |
| Nref                   | 5686                | 5634                    |
| Tmin, Tmax             | 0.612, 0.722        | 0.818, 0.888            |
| Tmin'                  | 0.541               |                         |

Correction method= # Reported T Limits: Tmin=0.818 Tmax=0.888  
AbsCorr = GAUSSIAN

Data completeness= 0.991                      Theta(max)= 74.811

R(reflections)= 0.0577( 4945)                      wR2(reflections)= 0.1696( 5634)

S = 1.040                      Npar= 323

---

### 3.2 X-Ray Crystallographic Data of compound 9

The crystal structure has been deposited at the Cambridge Crystallographic Data Center and allocated the deposition number CCDC: 2118174. This data can be obtained free of charge from the Cambridge Crystallographic Data Center via [www.ccdc.cam.ac.uk/data\\_request/ci](http://www.ccdc.cam.ac.uk/data_request/ci)

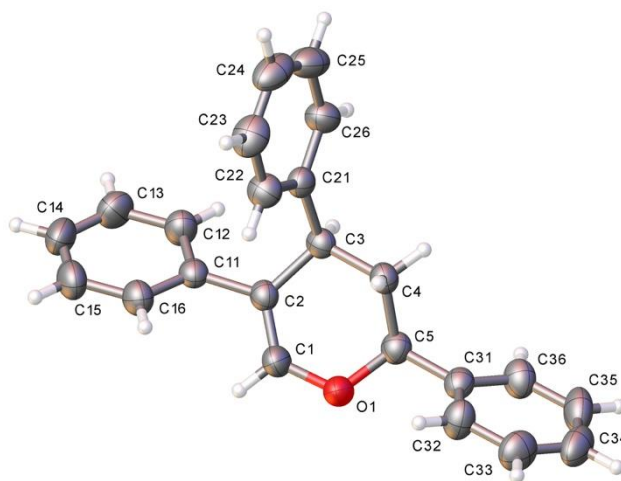

**Figure 3.** X-ray crystal structure of (2R\*,4S\*)-2,4,5-triphenyl-3,4-dihydro-2H-pyran **9**

### Experimental

Single crystals of  $C_{23}H_{20}O$  (**9**) were plates. A suitable crystal was selected and kept at 298.15 K during data collection. Using Olex2, the structure was solved with the ShelXT structure solution program using Direct Methods and refined with the ShelXL refinement package using Least Squares minimisation.

X-Ray crystallographic data of **9** (Figure 3). Crystal data and structure refinement for **9**

---

Bond precision: C-C = 0.0023 Å

Wavelength=0.71073

Cell: a=16.6186(11) b=6.2601(4) c=16.7987(12)  
alpha=90 beta=100.025(7) gamma=90

Temperature: 298 K

|                        | Calculated   | Reported     |
|------------------------|--------------|--------------|
| Volume                 | 1721.0(2)    | 1720.9(2)    |
| Space group            | P 21/c       | P 1 21/c 1   |
| Hall group             | -P 2ybc      | -P 2ybc      |
| Moiety formula         | C23 H20 O    | C23 H20 O    |
| Sum formula            | C23 H20 O    | C23 H20 O    |
| Mr                     | 312.39       | 312.39       |
| Dx, g cm <sup>-3</sup> | 1.206        | 1.206        |
| Z                      | 4            | 4            |
| Mu (mm <sup>-1</sup> ) | 0.072        | 0.072        |
| F000                   | 664.0        | 664.0        |
| F000'                  | 664.27       |              |
| h, k, lmax             | 23, 8, 23    | 22, 8, 23    |
| Nref                   | 4876         | 4026         |
| Tmin, Tmax             | 0.976, 0.985 | 0.981, 0.987 |
| Tmin'                  | 0.975        |              |

Correction method= # Reported T Limits: Tmin=0.981 Tmax=0.987 AbsCorr = GAUSSIAN

Data completeness= 0.826

Theta(max)= 29.698

R(reflections)= 0.0479( 2752)

wR2(reflections)= 0.1192( 4026)

S = 1.023

Npar= 218

---

#### 4. NMR spectra of compounds

##### $^1\text{H}$ NMR (400 MHz, $\text{CDCl}_3$ )

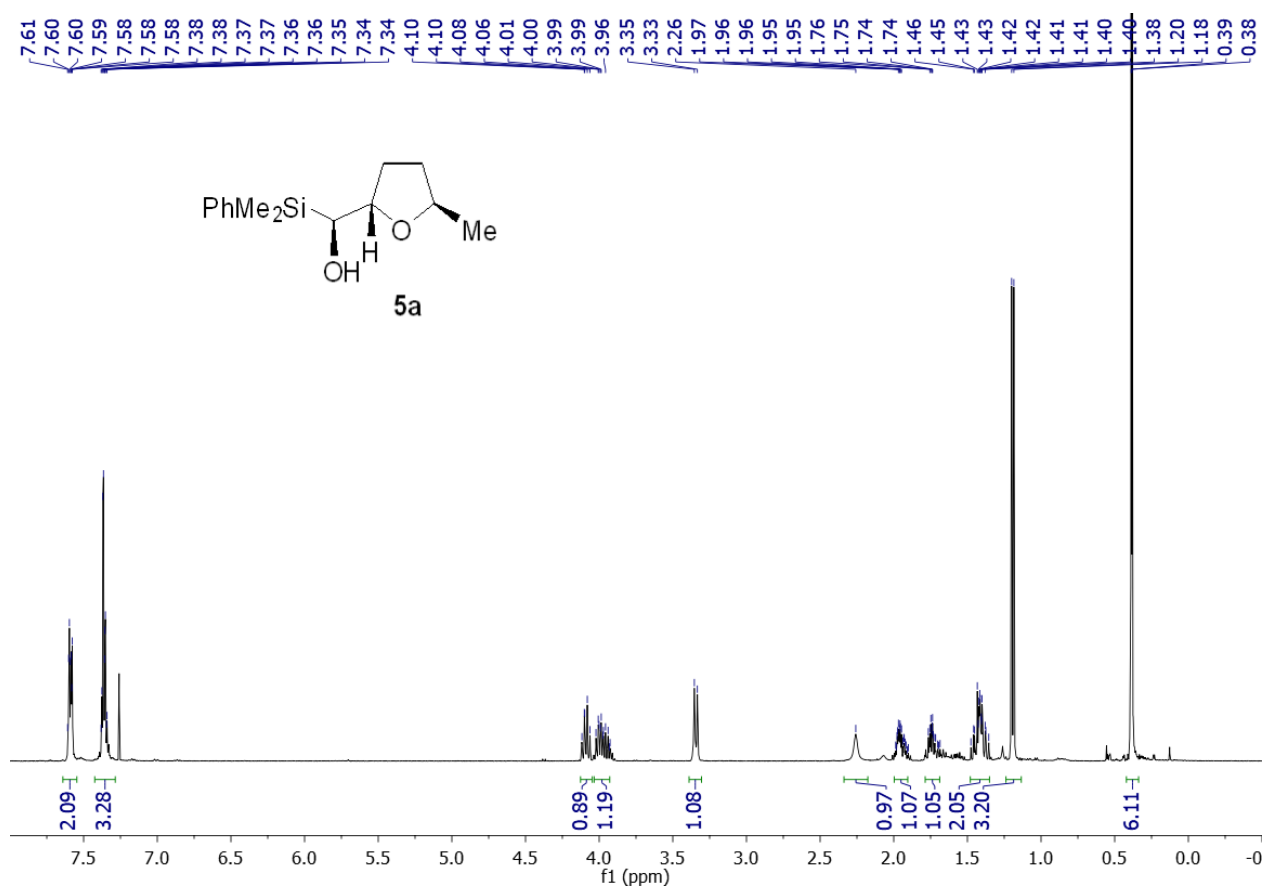

##### $^{13}\text{C}$ NMR (101 MHz, $\text{CDCl}_3$ )

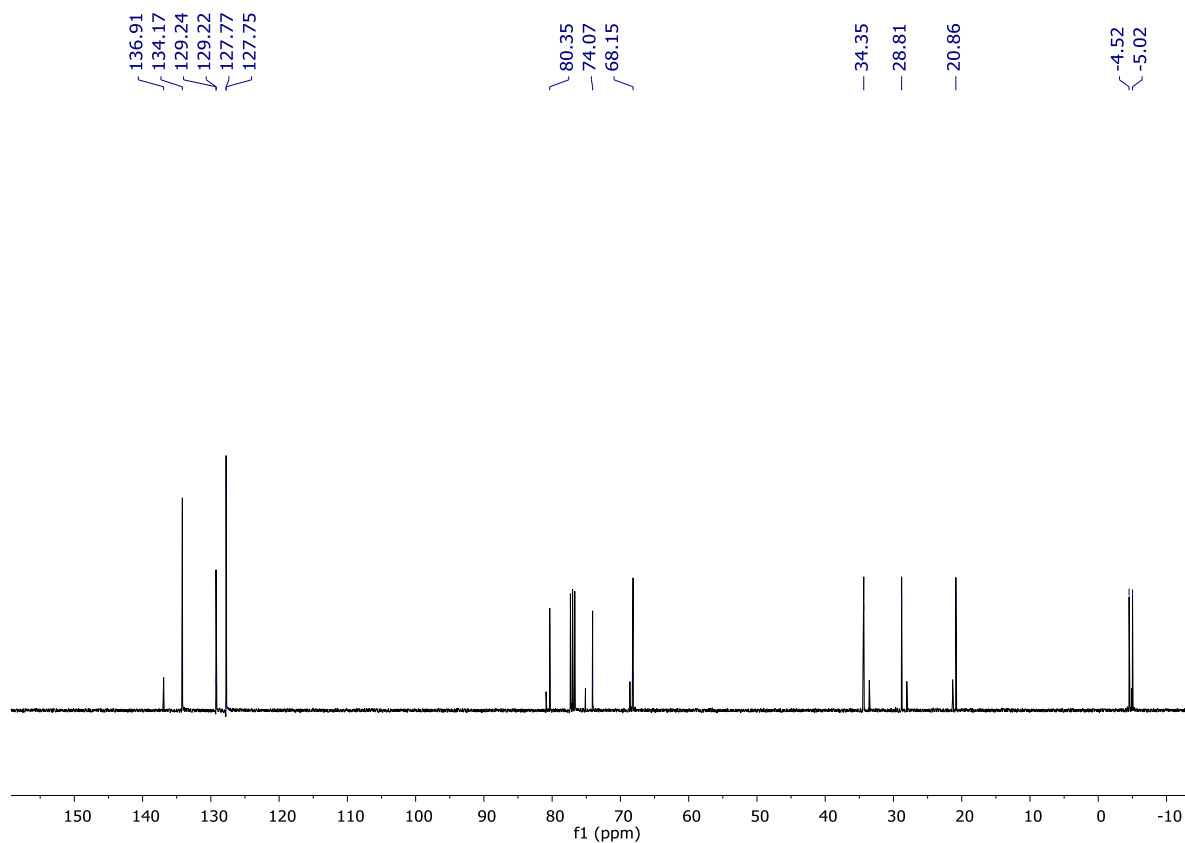

**<sup>1</sup>H NMR (400 MHz, CDCl<sub>3</sub>)**

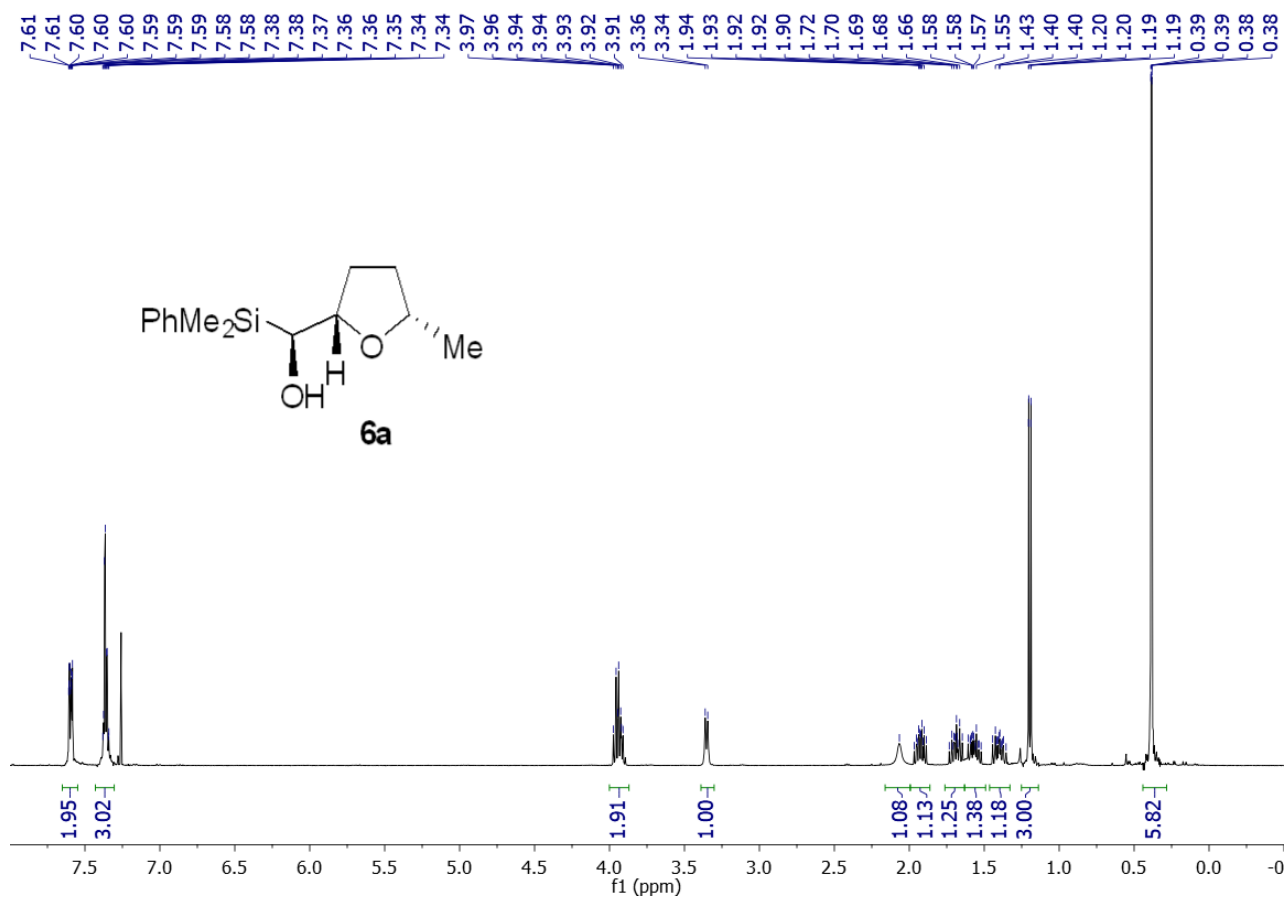

**<sup>13</sup>C NMR (101 MHz, CDCl<sub>3</sub>)**

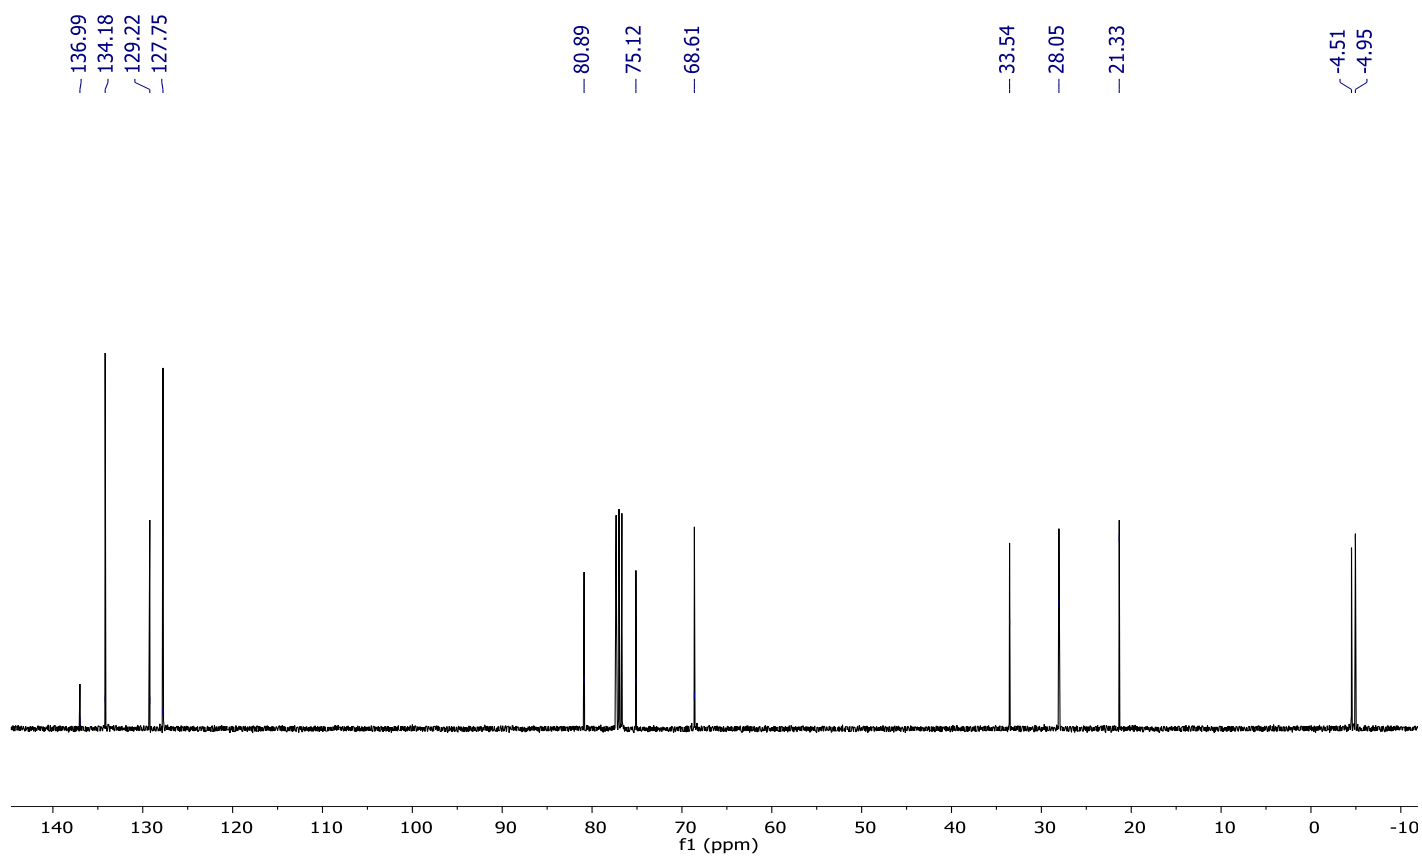

**<sup>1</sup>H NMR (400 MHz, CDCl<sub>3</sub>)**

7.61  
7.60  
7.59  
7.59  
7.36  
7.36  
7.35  
7.35

4.11  
4.10  
4.09  
4.08  
4.08  
4.06  
3.53  
3.53  
3.50

1.70  
1.69  
1.67  
1.66  
1.46  
1.44  
1.43  
1.41  
1.19  
1.18  
1.17  
1.13  
1.12  
0.99  
0.38  
0.37

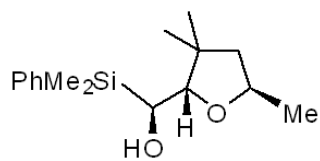

**5b**

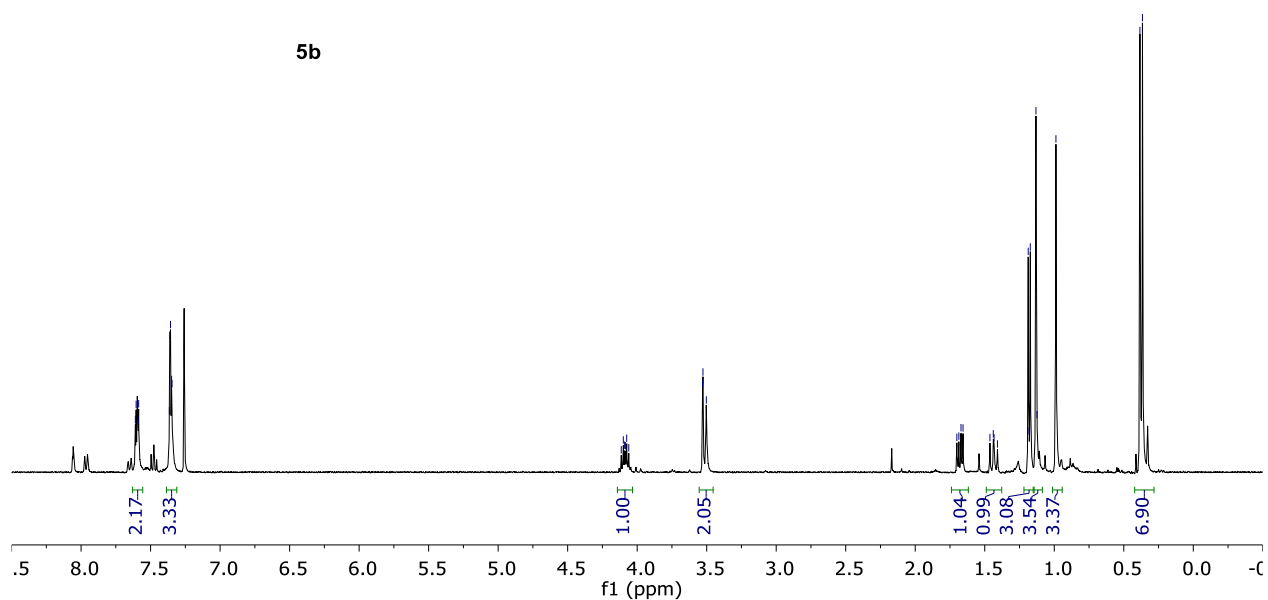

**<sup>13</sup>C NMR (101 MHz, CDCl<sub>3</sub>)**

137.30  
134.46  
134.22  
130.23  
129.79  
129.09  
127.87  
127.69

88.31

73.28

65.02

49.29

42.28

29.19

24.25

21.10

4.49  
4.76

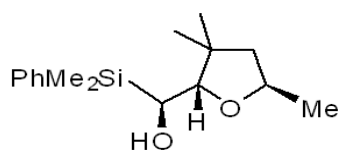

**5b**

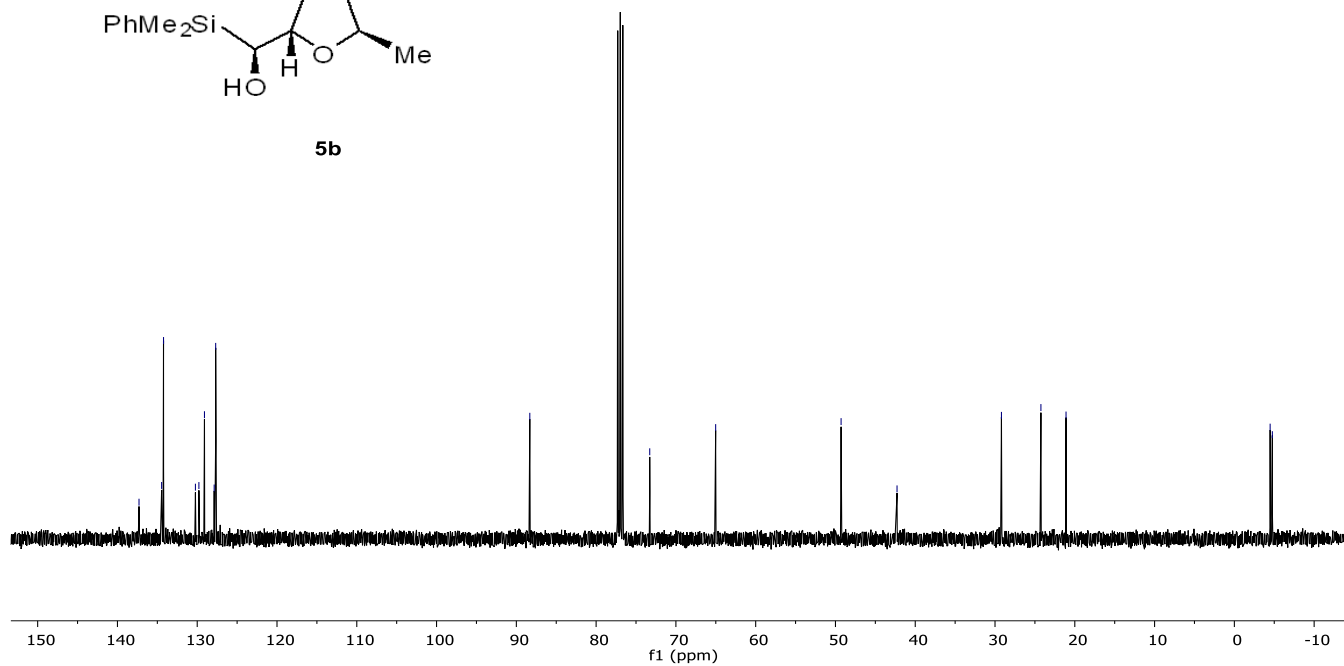



**<sup>1</sup>H NMR (400 MHz, CDCl<sub>3</sub>)**

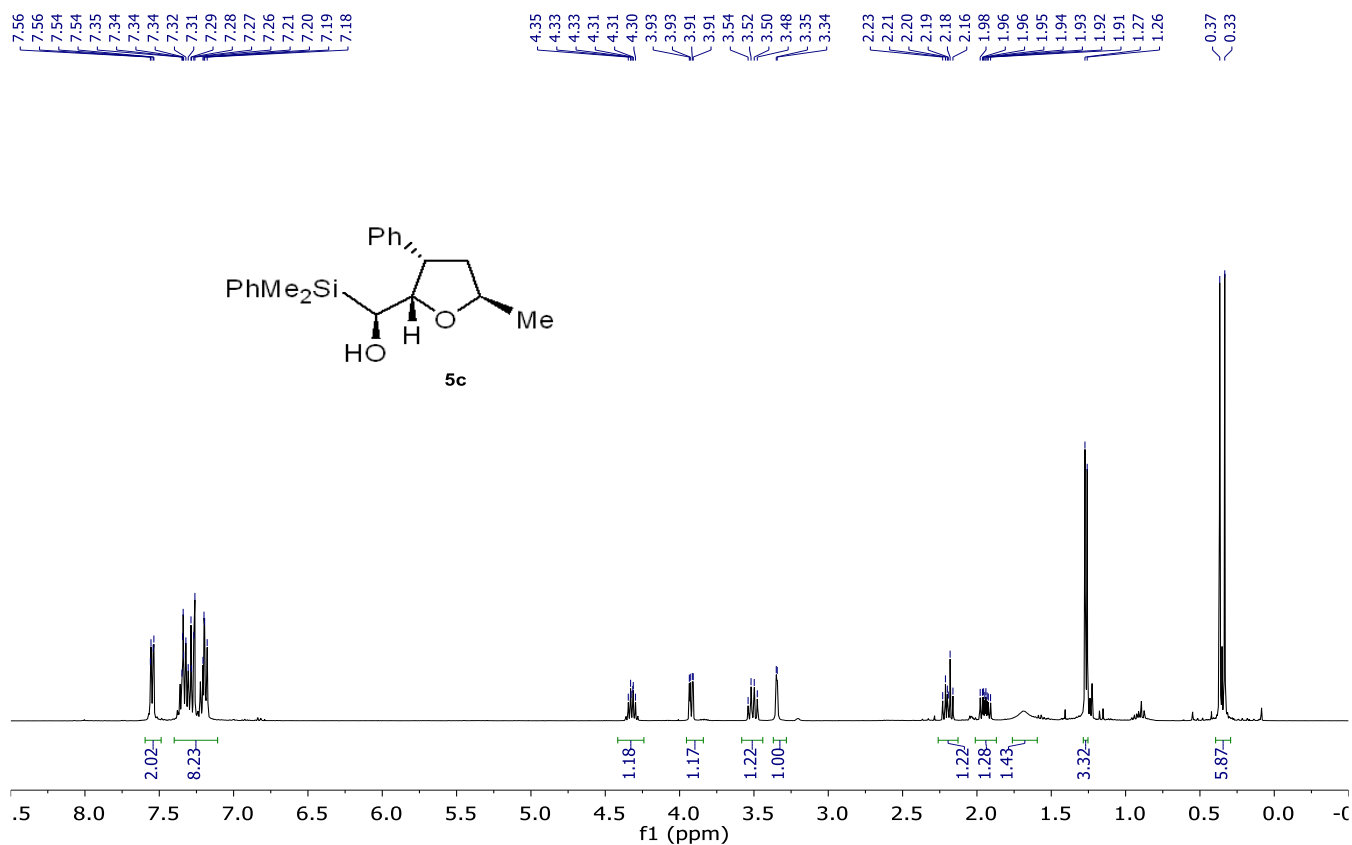

**<sup>13</sup>C NMR (101 MHz, CDCl<sub>3</sub>)**

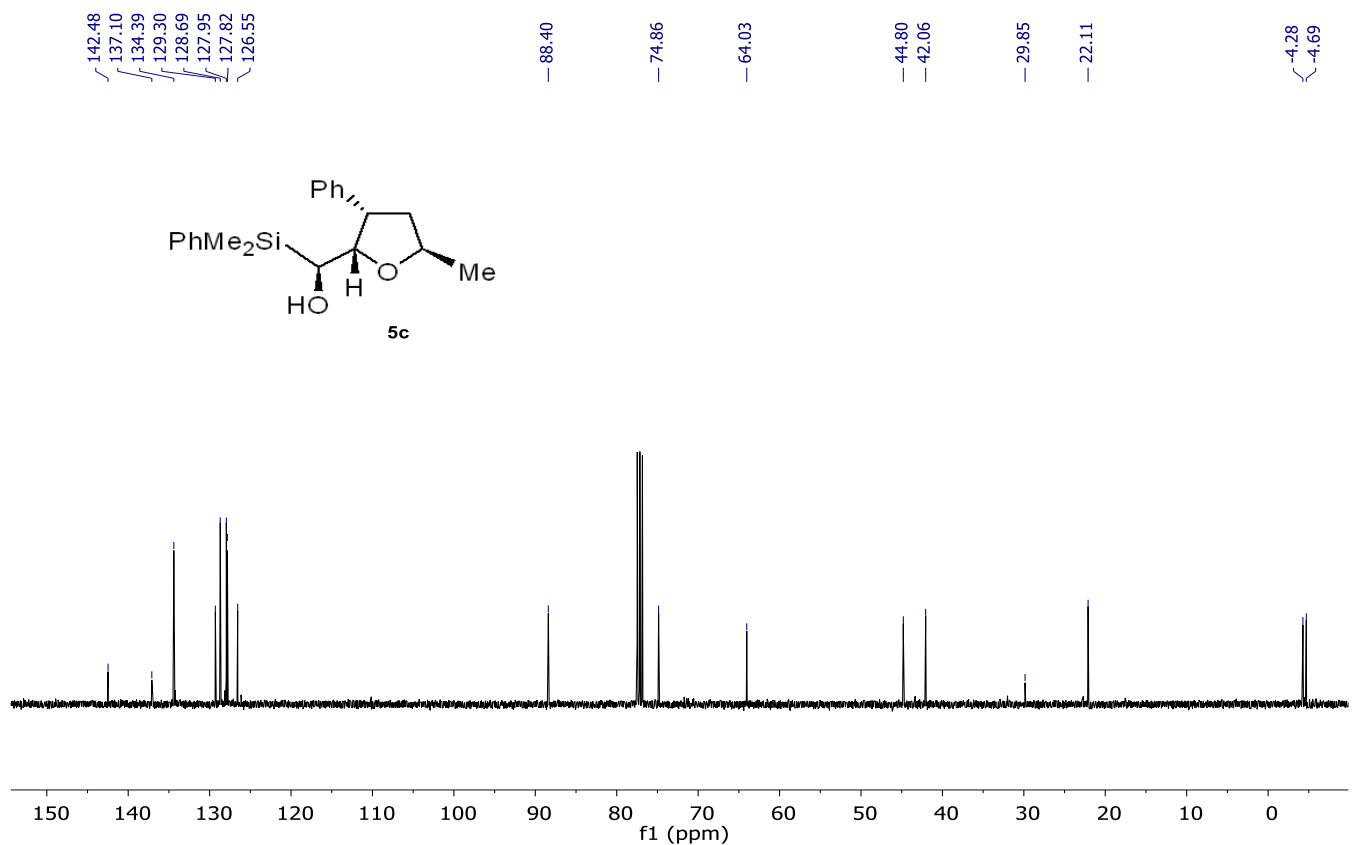

**<sup>1</sup>H NMR (400 MHz, CDCl<sub>3</sub>)**

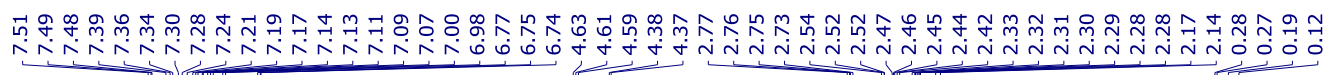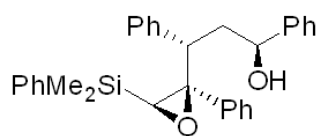

**4d (+ minor)**

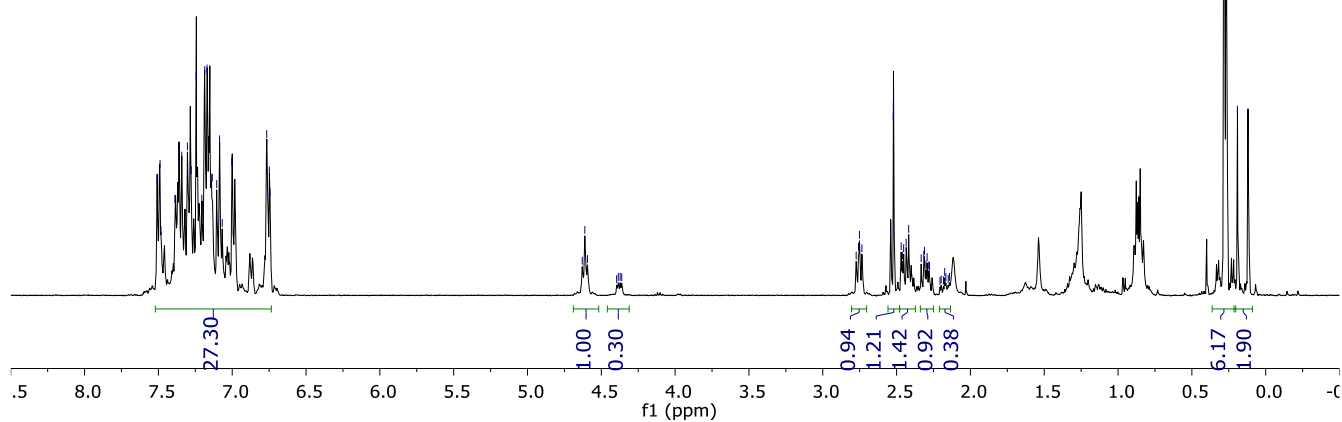

**<sup>13</sup>C NMR (101 MHz, CDCl<sub>3</sub>)**

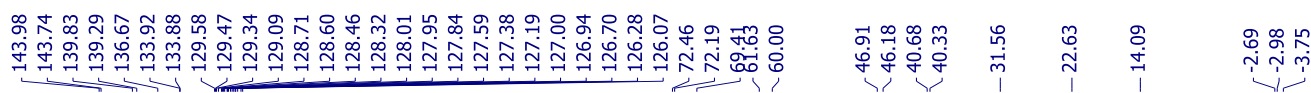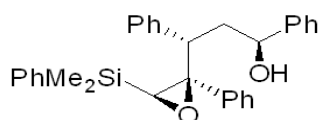

**4d (+ minor)**

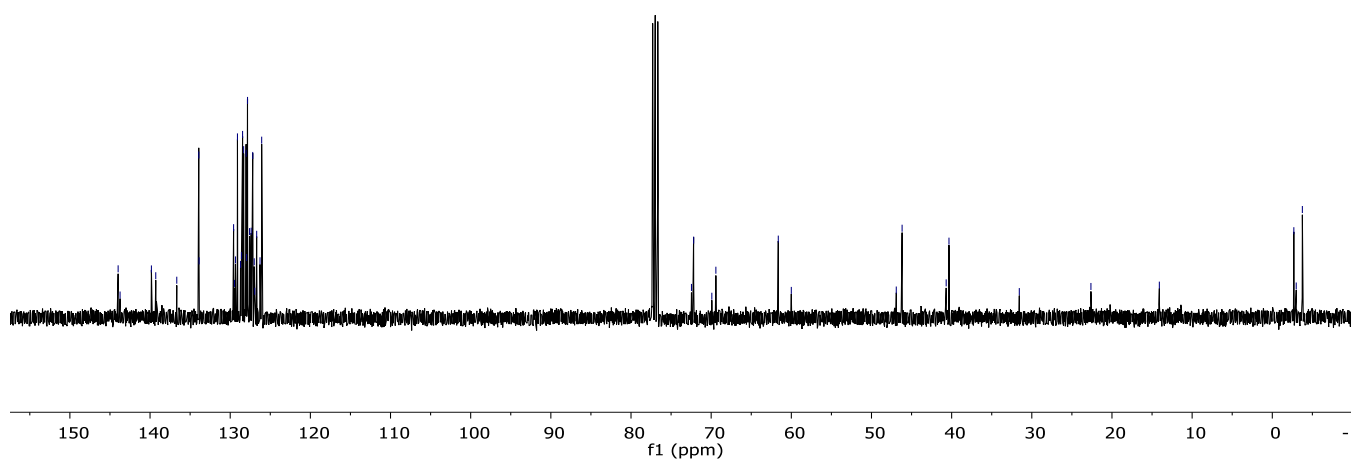

**<sup>1</sup>H NMR (400 MHz, CDCl<sub>3</sub>)**

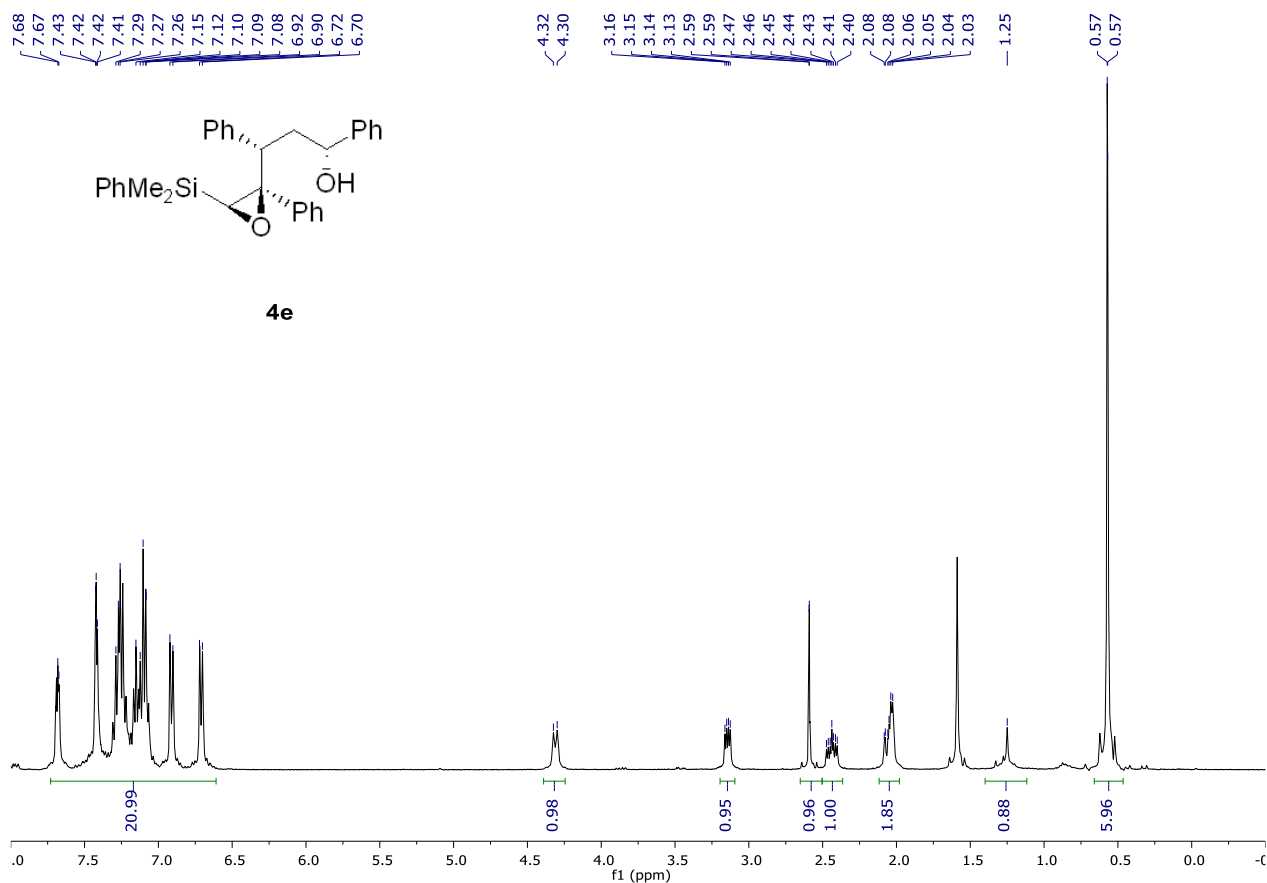

**<sup>13</sup>C NMR (101 MHz, CDCl<sub>3</sub>)**

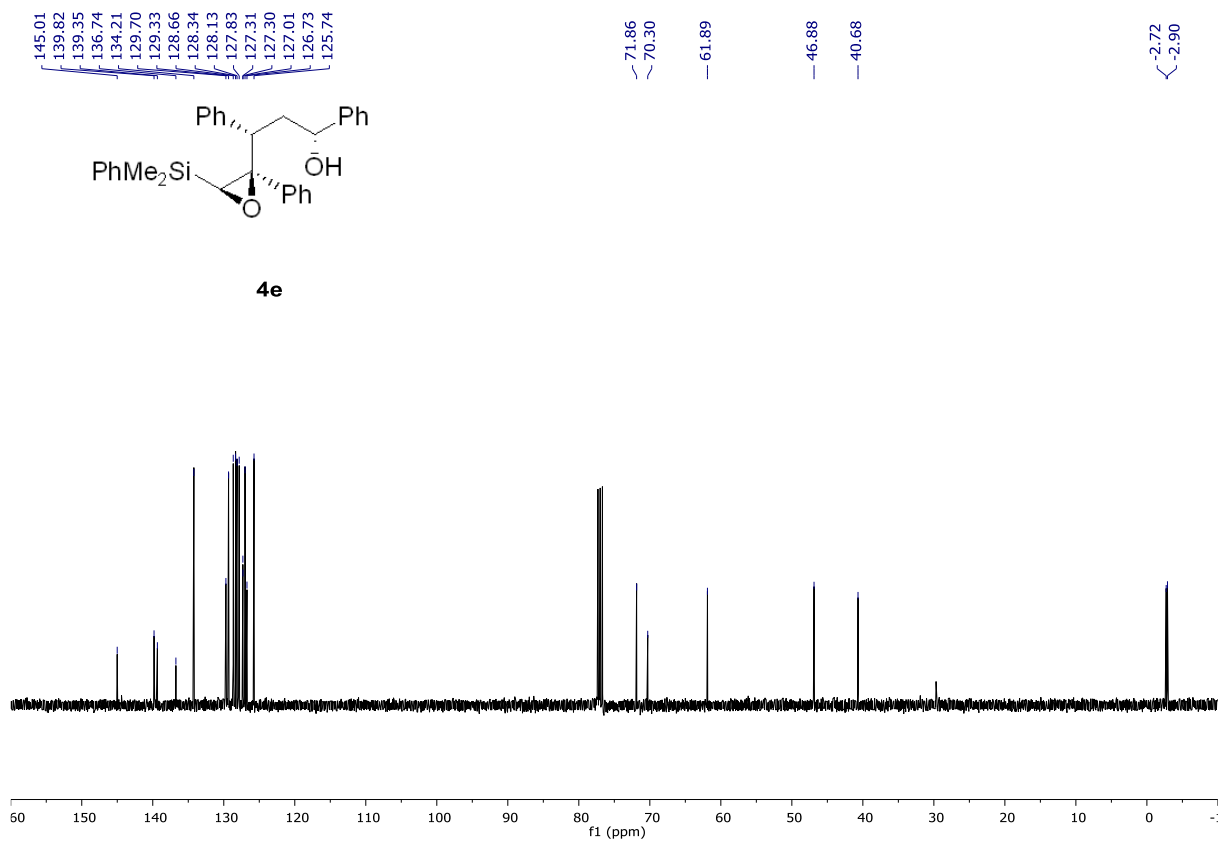

**<sup>1</sup>H NMR (400 MHz, CDCl<sub>3</sub>)**

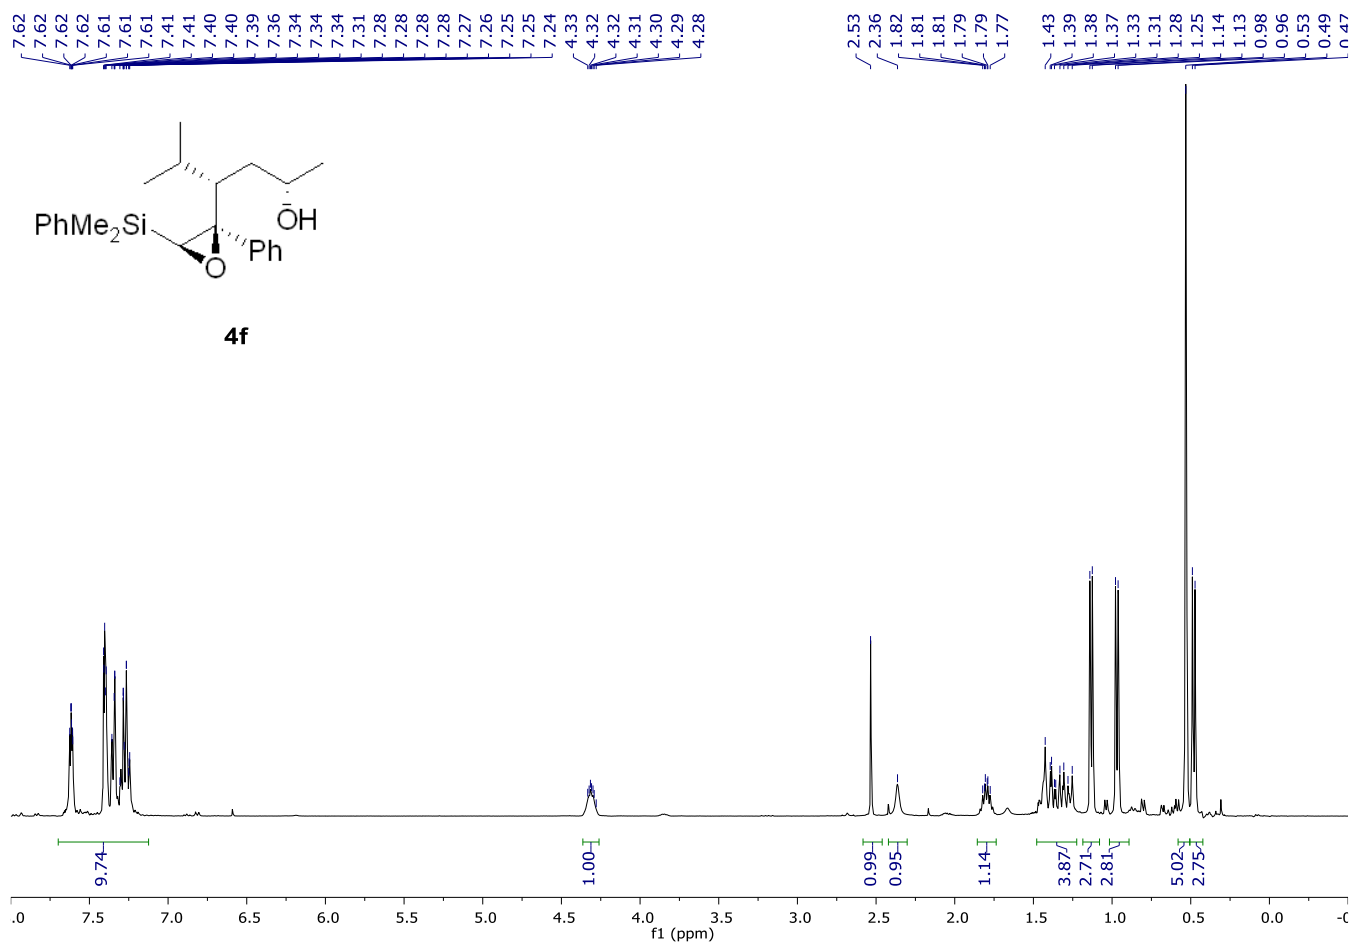

**<sup>13</sup>C NMR (101 MHz, CDCl<sub>3</sub>)**

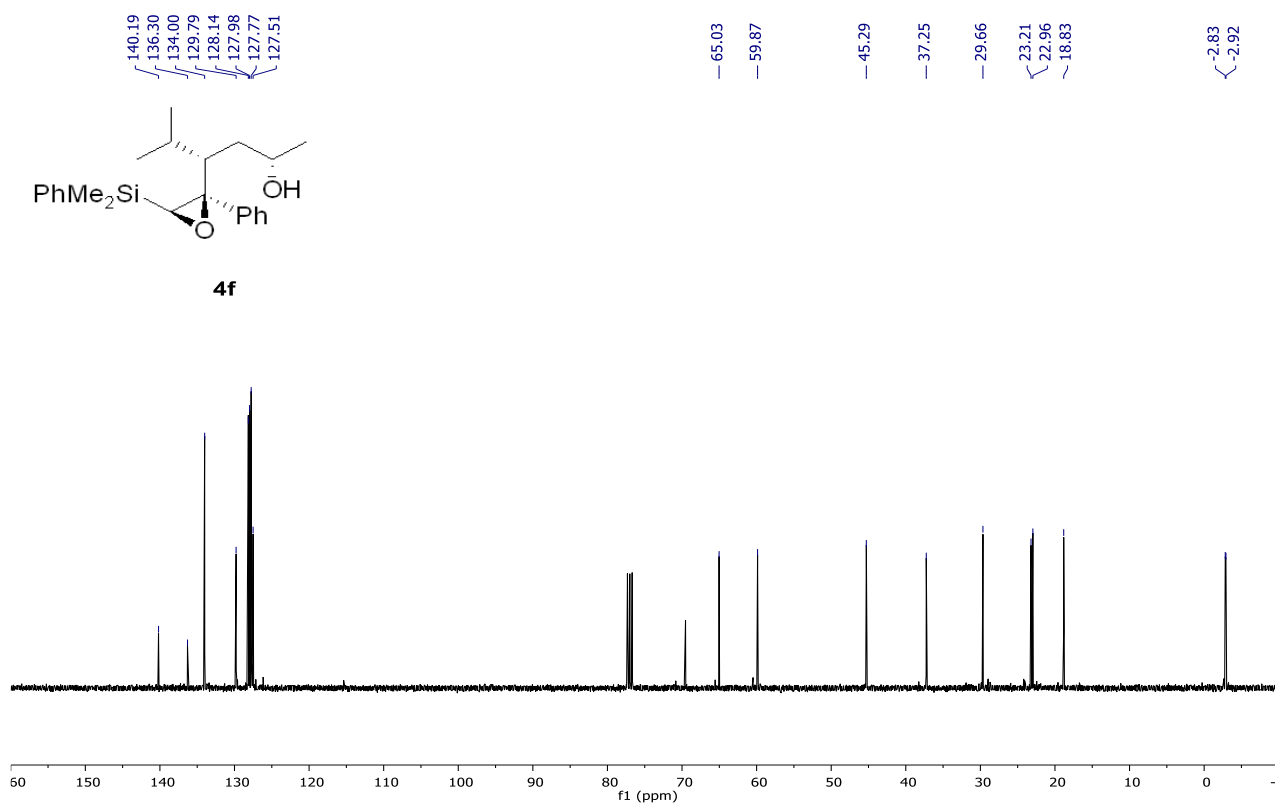

**<sup>1</sup>H NMR (400 MHz, CDCl<sub>3</sub>)**

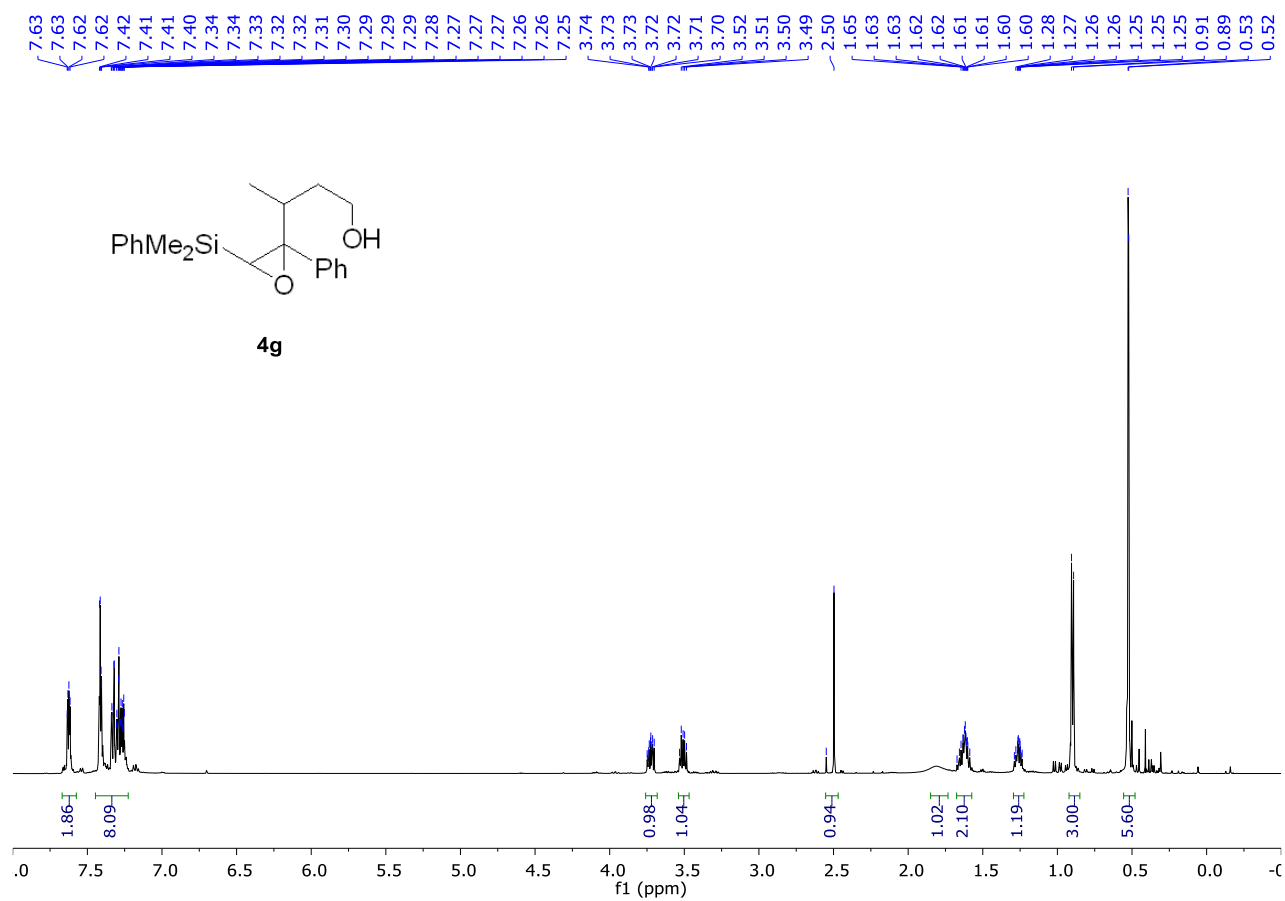

<sup>13</sup>C NMR (101 MHz, CDCl<sub>3</sub>)

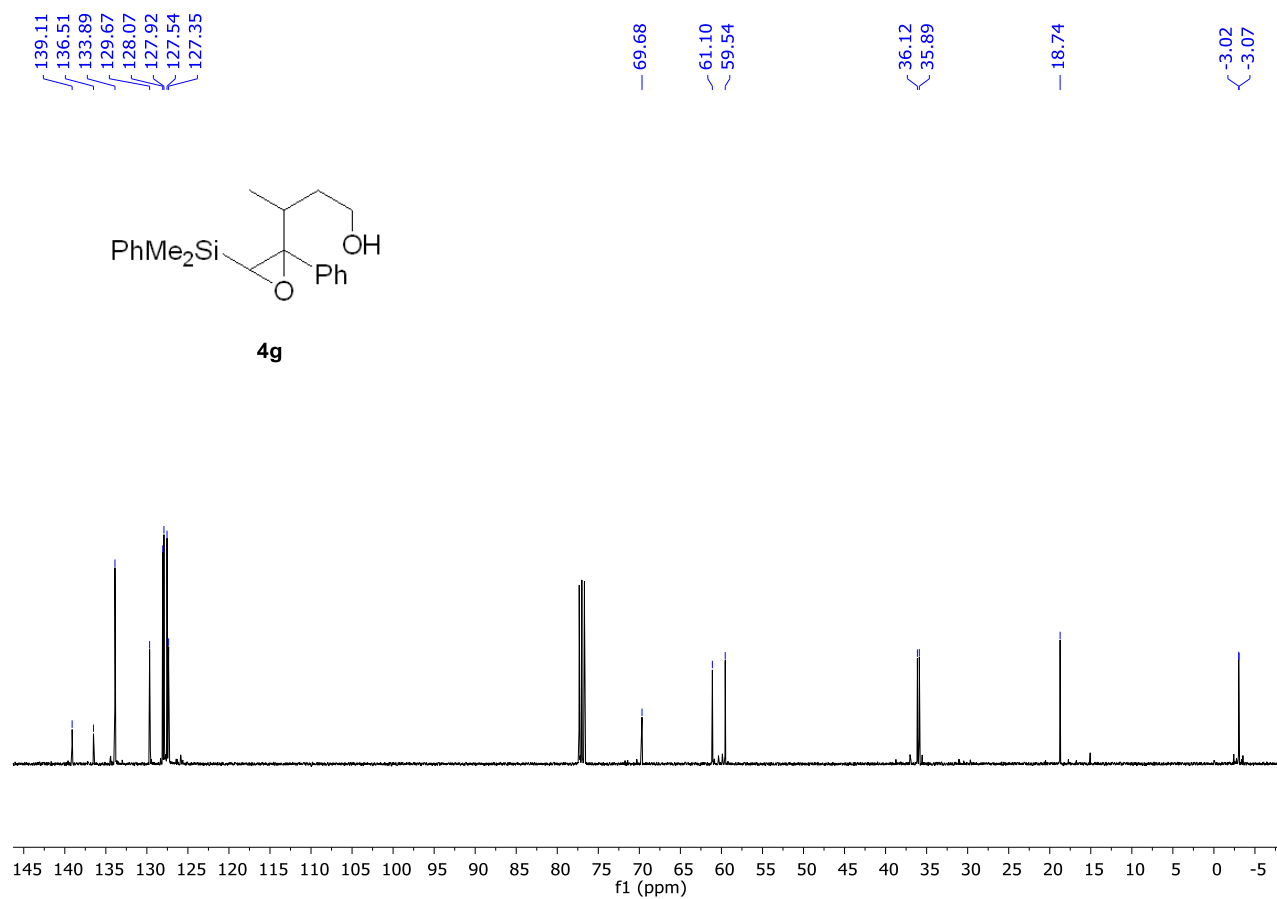

**<sup>1</sup>H NMR (400 MHz, CDCl<sub>3</sub>)**

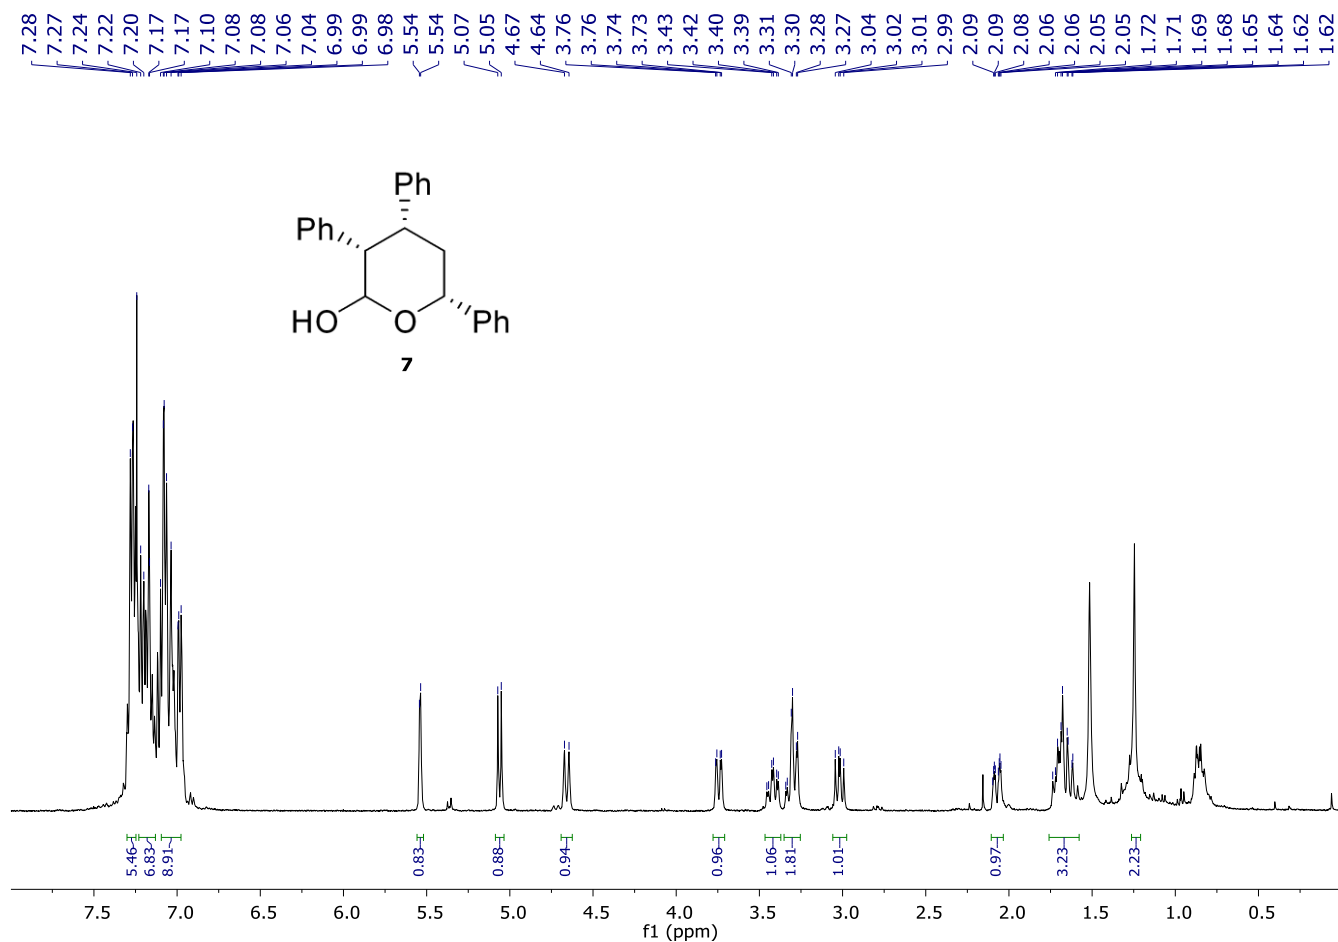

**<sup>13</sup>C NMR (101 MHz, CDCl<sub>3</sub>)**

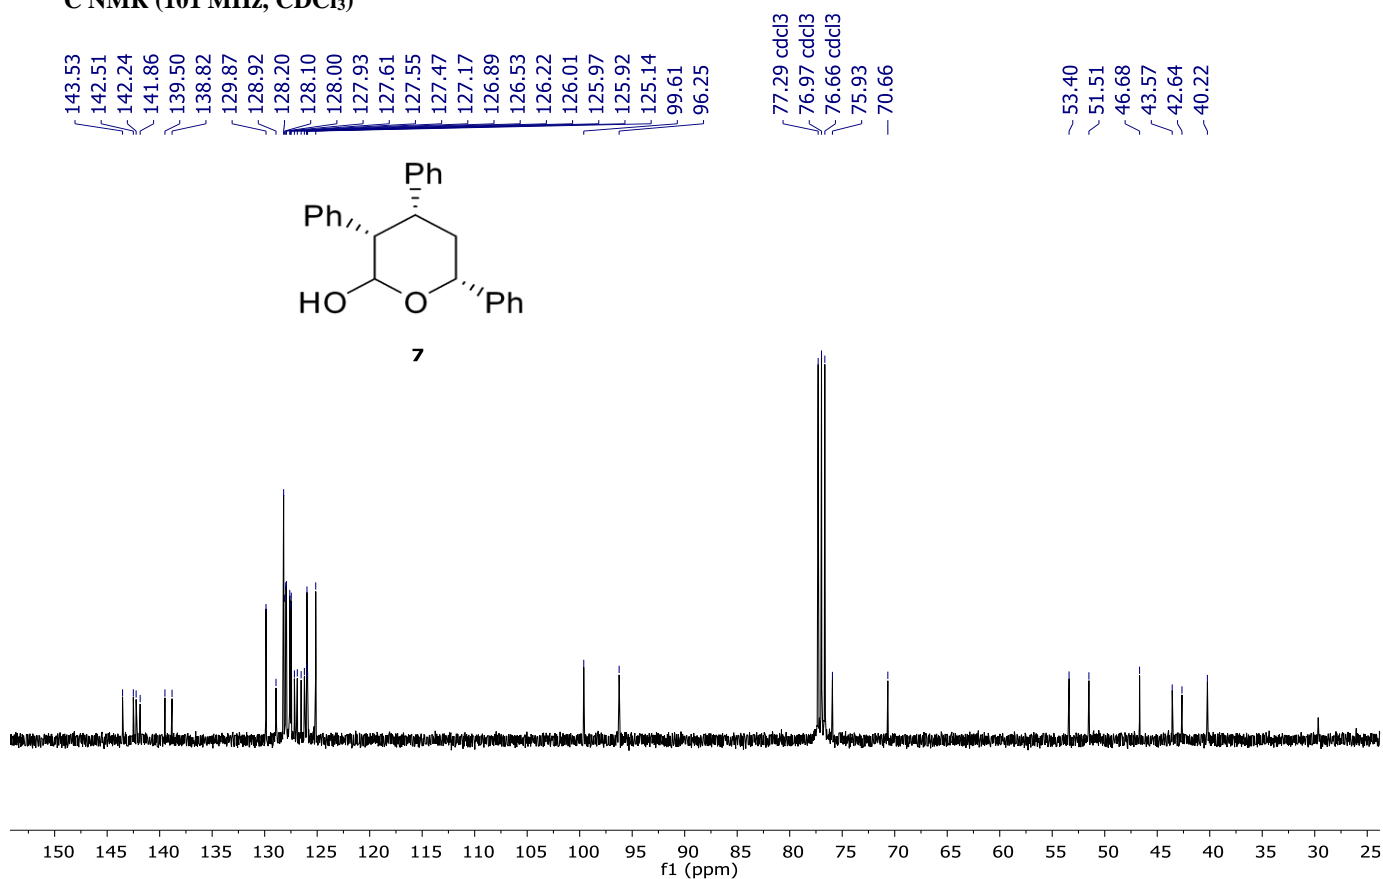

<sup>1</sup>H NMR (400 MHz, CDCl<sub>3</sub>)

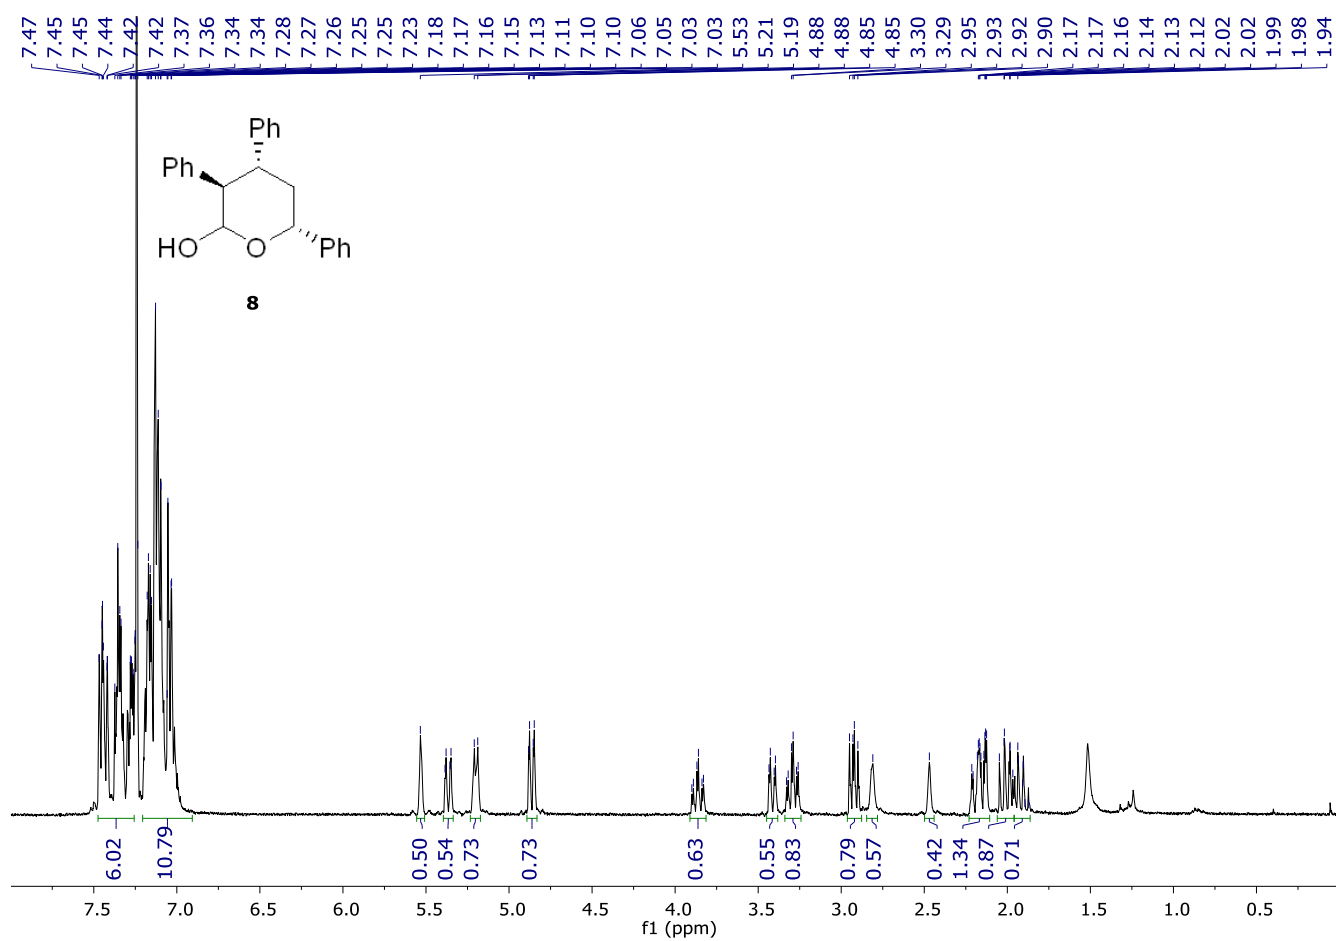

<sup>13</sup>C NMR (101 MHz, CDCl<sub>3</sub>)

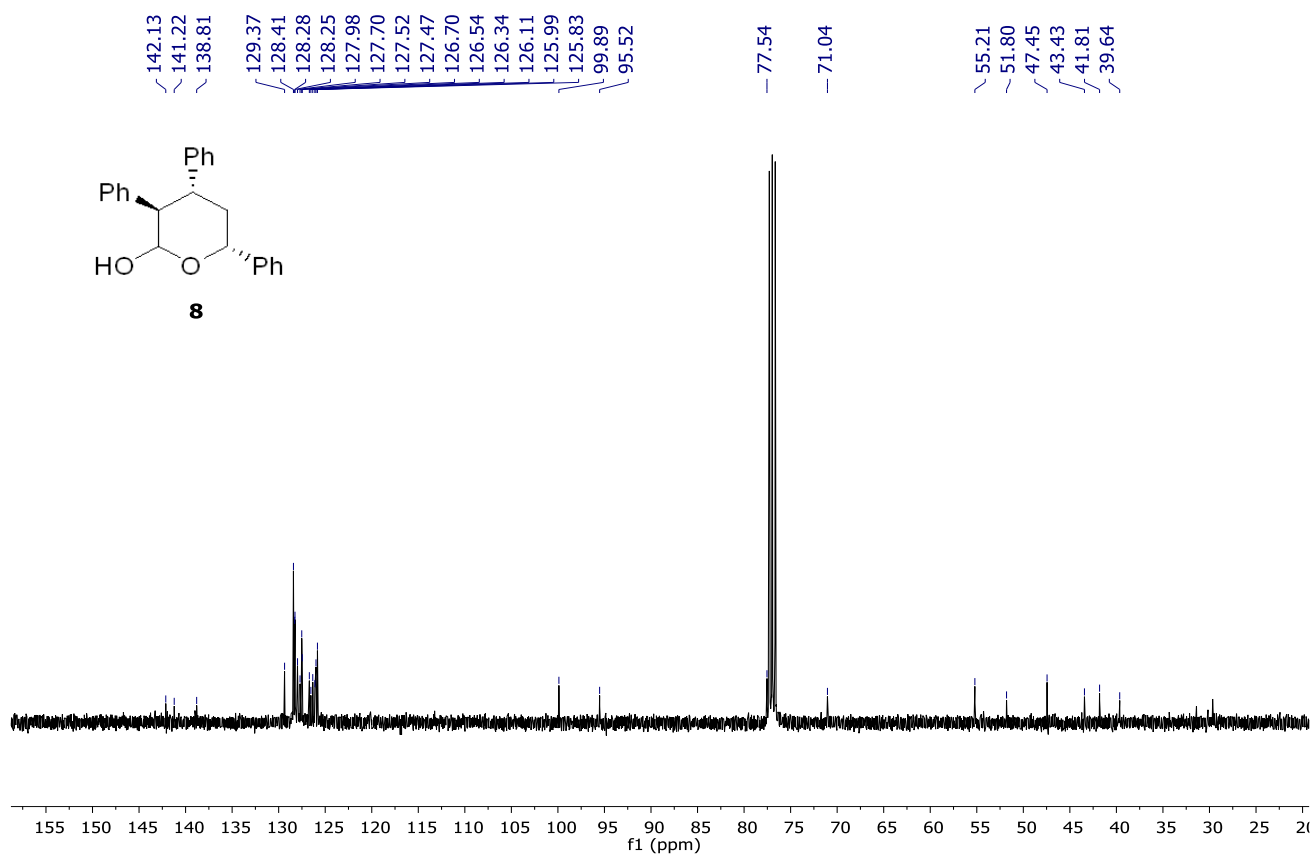

**<sup>1</sup>H NMR (400 MHz, CDCl<sub>3</sub>)**

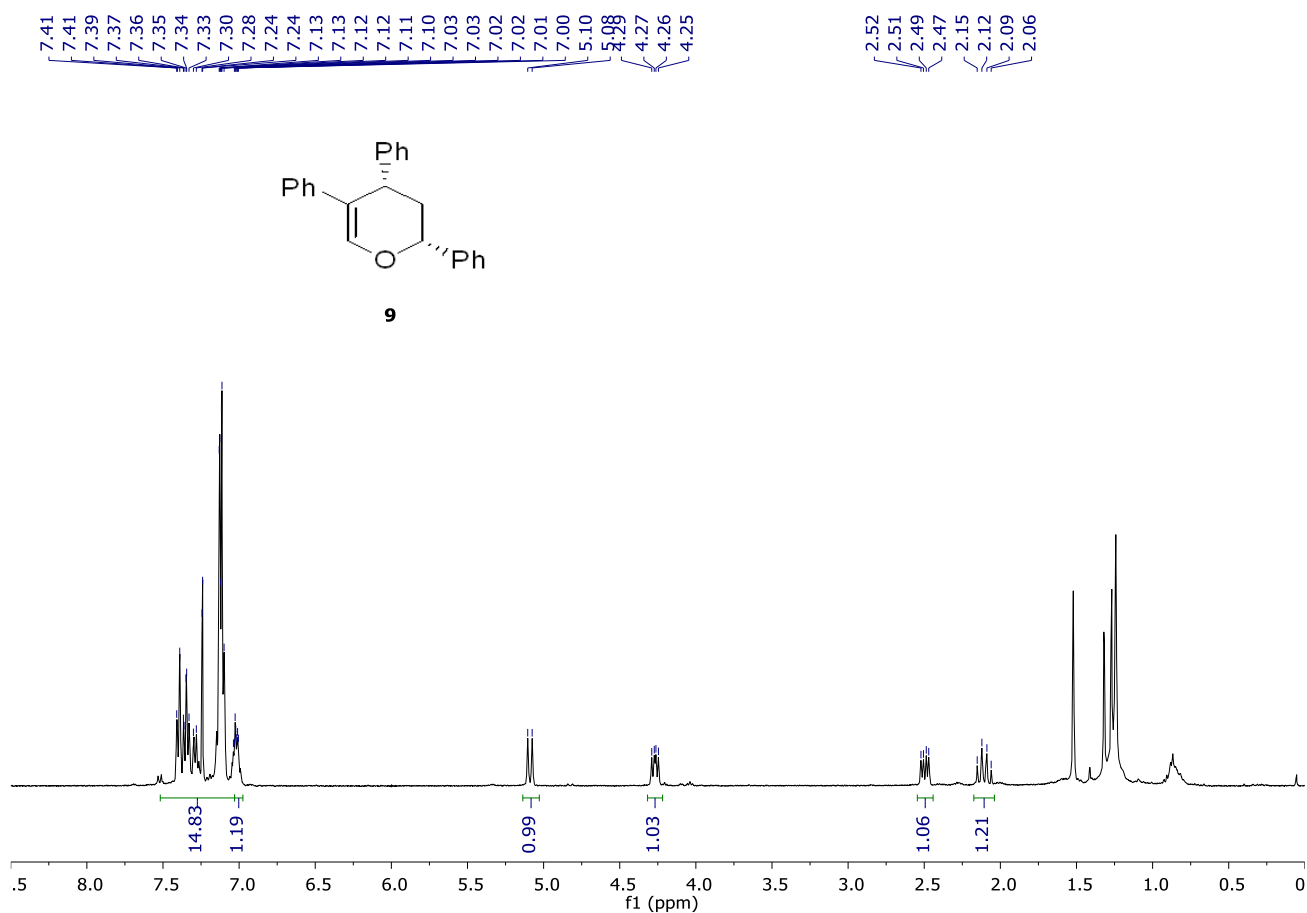

**<sup>13</sup>C NMR (101 MHz, CDCl<sub>3</sub>)**

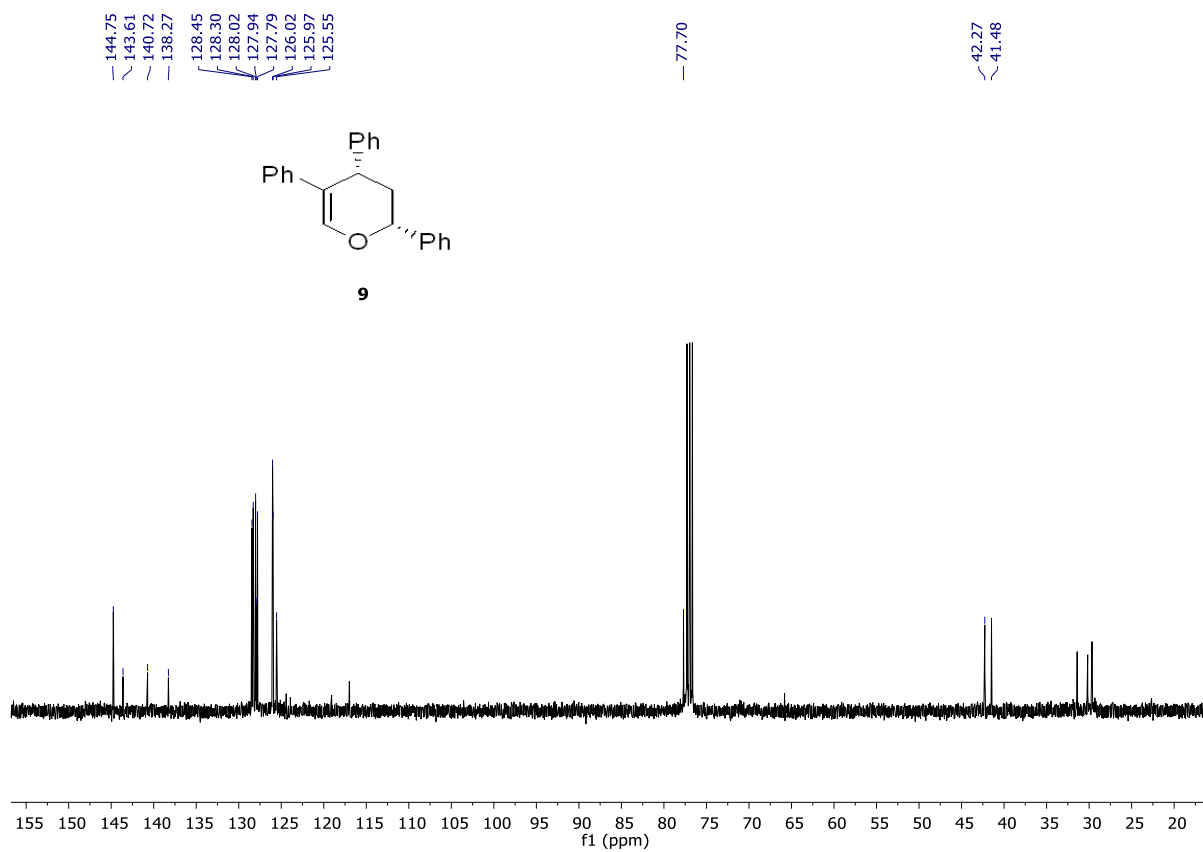



Chemical structure of **10**: Cc1ccc(Cc2ccccc2)c3cc(Cc4ccccc4)cc(Cc5ccccc5)c3O

<sup>1</sup>H NMR spectrum (CDCl<sub>3</sub>) of compound **10**. The x-axis represents the chemical shift in ppm (f1), ranging from 0.00 to 8.00. The spectrum shows several multiplets in the aromatic region (6.5-7.5 ppm) and a large peak for the dimethylphenylsilyl group (around 2.5 ppm). Integration values are shown below the baseline.

Integration values (from left to right): 1.95, 8.95, 8.64, 1.93, 1.00, 1.03, 1.03, 1.05, 6.24.

<sup>13</sup>C NMR (101 MHz, CDCl<sub>3</sub>)

Chemical structure of **10** is shown above the spectrum.

Chemical shift values (ppm) are listed above the spectrum:

- 133.74, 130.94, 128.63, 128.54, 128.23, 128.02, 127.48, 127.26, 127.09, 126.33, 126.13, 125.64
- 77.28 cdcl3, 76.97 cdcl3, 76.65 cdcl3
- 46.74, 41.30
- 2.28, -2.72

**10**

f1 (ppm)
